# Supplementary material for: Elevated ZC3H15 increases HCC growth and predicts poor survival after surgical resection
Source: PubMed Central journal article supplement (PMC5095072; doi:10.18632/oncotarget.9361), 2016-05-14
Supplement: oncotarget-07-37238-s001.pdf [file oncotarget-07-37238-s001.pdf]

## Elevated ZC3H15 increases HCC growth and predicts poor survival after surgical resection

### SUPPLEMENTARY TABLES

Supplementary Table S1: Relationship between DFRP1 protein expression and clinicopathologic characteristics of HCC (n=76\*).

See Supplementary File 1

Supplementary Table S2: Identification of signaling pathways influenced by DFRP1 by microarray

| Pathway                                        | Gene number | Changed gene | Gene Symbol(FC)     | %      |
|------------------------------------------------|-------------|--------------|---------------------|--------|
| Insulin Signaling Pathway                      | 22          | 2            | JUN(-4.490459)      | 9.09%  |
| Insulin Signaling Pathway                      | 22          | 2            | CSNK2A1(-4.3358665) | 9.09%  |
| PDGF Signaling Pathway                         | 29          | 2            | JUN(-4.490459)      | 6.90%  |
| PDGF Signaling Pathway                         | 29          | 2            | CSNK2A1(-4.3358665) | 6.90%  |
| AKT Signaling Pathway                          | 23          | 1            | FASLG(12.407429)    | 4.35%  |
| NF-kB Signaling Pathway                        | 24          | 1            | TNF(7.363243)       | 4.17%  |
| EGF Signaling Pathway                          | 28          | 2            | JUN(-4.490459)      | 7.14%  |
| EGF Signaling Pathway                          | 28          | 2            | CSNK2A1(-4.3358665) | 7.14%  |
| WNT Signaling Pathway                          | 26          | 6            | CTBP1(4.3070455)    | 23.08% |
| WNT Signaling Pathway                          | 26          | 6            | FRAT1(-28.891495)   | 23.08% |
| WNT Signaling Pathway                          | 26          | 6            | CREBBP(-4.432927)   | 23.08% |
| WNT Signaling Pathway                          | 26          | 6            | CSNK2A1(-4.3358665) | 23.08% |
| WNT Signaling Pathway                          | 26          | 6            | MYC(-6.8308425)     | 23.08% |
| WNT Signaling Pathway                          | 26          | 6            | CCND1(-4.163627)    | 23.08% |
| PTEN dependent cell cycle arrest and apoptosis | 19          | 1            | FASLG(12.407429)    | 5.26%  |
| Rho cell motility signaling pathway            | 33          | 1            | ARHGAP6(-7.478171)  | 3.03%  |
| Integrin Signaling Pathway                     | 38          | 1            | JUN(-4.490459)      | 2.63%  |
| Ras Signaling Pathway                          | 24          | 1            | RALBP1(-5.780125)   | 4.17%  |
| p53 Signaling Pathway                          | 17          | 2            | TP53(-4.1172166)    | 11.76% |
| p53 Signaling Pathway                          | 17          | 2            | CCND1(-4.163627)    | 11.76% |
| TGF beta signaling pathway                     | 20          | 3            | ZFYVE9(5.640574)    | 15%    |
| TGF beta signaling pathway                     | 20          | 3            | CREBBP(-4.432927)   | 15%    |
| TGF beta signaling pathway                     | 20          | 3            | EP300(-4.515618)    | 15%    |
